# Supplementary material
Source: PubMed Central journal article supplement (PMC4048573)

## SUPPLEMENTARY FIGURES S1 AND S2

### LEGENDS TO SUPPLEMENTARY FIGURES

**Figure S1.** Flow cytometry of mitochondrial mass (NAO and MTG),  $\Delta\psi_m$ , (DiOC<sub>6</sub> and TMRM), ONOO<sup>-</sup> (DAR-4M), NO (DAF-FM), H<sub>2</sub>O<sub>2</sub> (DCF-DA), mitochondrial Ca<sup>2+</sup> levels (Rhod-2) in PBL of 48 SLE patients and 32 matched healthy controls after overnight incubation without (panel A) and with CD3/CD28 co-stimulation (panel B). MFI values were compared to those of control PBL normalized at 1.0 for each experiment. Values normalized to mitochondrial mass were determined by MTG (panel C, left panel) and NAO fluorescence (panel C, right panel). Data were analyzed by two-tailed paired t-test; p values < 0.05 are indicated for each comparison.

**Figure S2.** Mitochondrial mass-normalized O<sub>2</sub> consumption by PBL of SLE patients and matched healthy controls. A, Mitochondrial mass-adjusted ETC activity was measured by O<sub>2</sub> consumption in rested PBL of 48 SLE and 32 matched healthy controls. O<sub>2</sub> consumption in rested PBL was normalized to mitochondrial mass. Mitochondrial mass was assessed by MTG (left panel) and NAO mean fluorescence intensity (MFI) in lupus and matched healthy control PBL in parallel (right panel). For each experiment, mitochondrial mass of lupus PBL was expressed relative to that of control PBL set to 1.0. B, Mitochondrial mass-adjusted ETC activity measurement by O<sub>2</sub> consumption in CD3/CD28-stimulated PBL of 48 SLE and 32 matched healthy controls. ETC activity was assessed relative to mitochondrial mass determined by MTG (left panel) and NAO fluorescence as described for resting cells (right panel). Data were log transformed and compared by paired t-test. P values < 0.05 are indicated for each comparison.

Figure S1

A

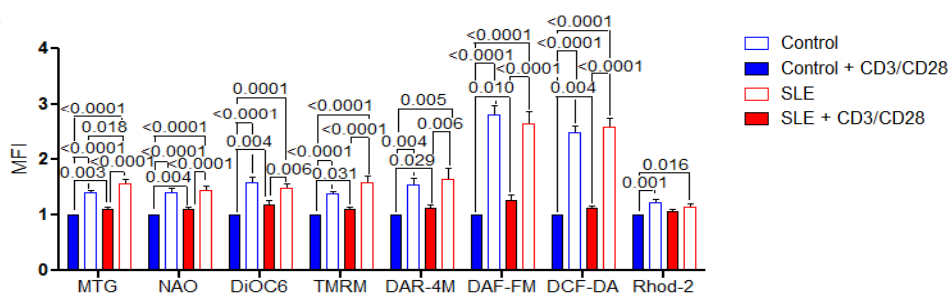

B

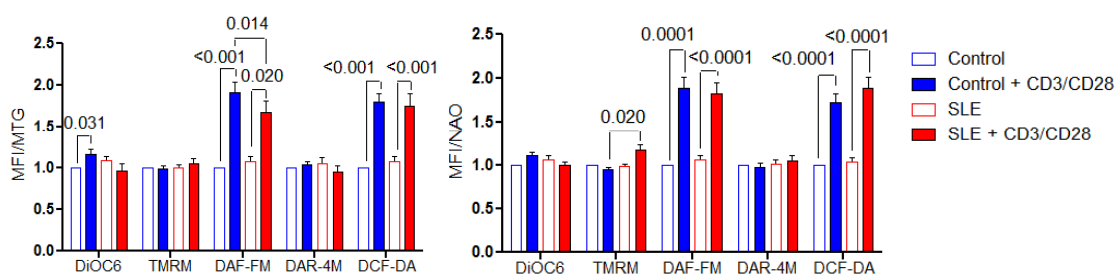

Figure S2

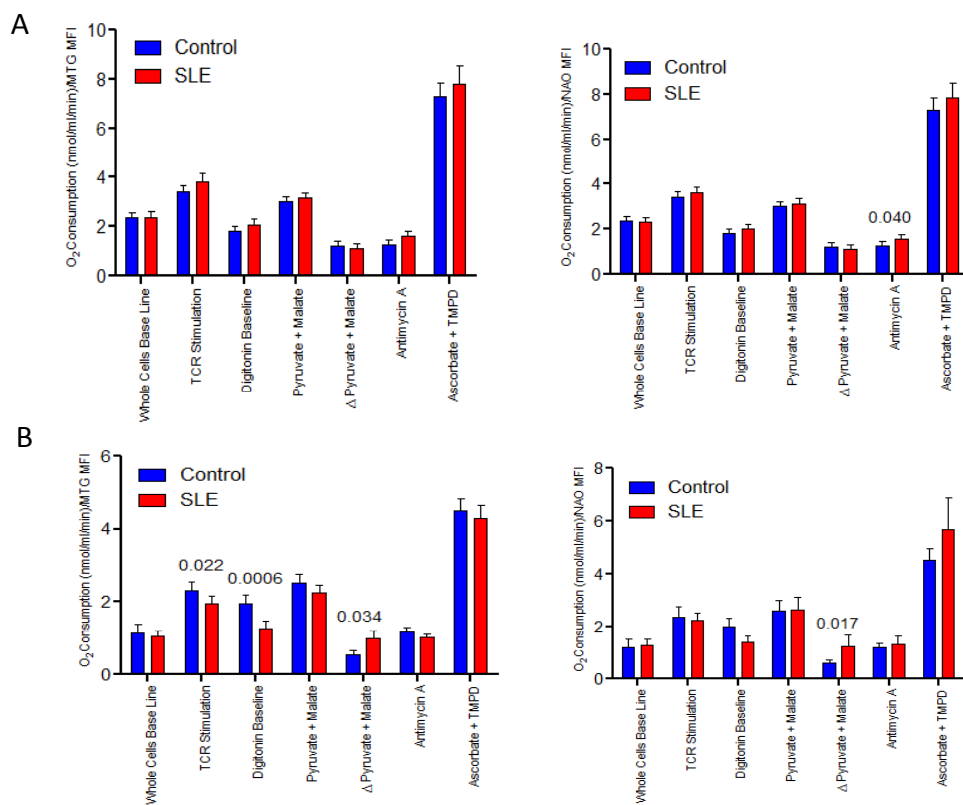

Supplement: Supp_Data.pdf [file Supp_Data.pdf]
